# Supplementary material for: Tunable Schottky and ohmic contacts in the Ti2NF2/α-Te van der Waals heterostructure
Source: Royal Society of Chemistry journal article supplement (doi:10.1039/d2cp02054h), 2022-01-01
Supplement: d2cp02054h1.pdf [file d2cp02054h1.pdf]

## Supporting Information

### Tunable Schottky and Ohmic contacts in $\text{Ti}_2\text{NF}_2/\alpha\text{-Te}$ van der Waals heterostructure

Jingwen Jiang<sup>a</sup>, Yiguo Xu<sup>b,\*</sup>, Xiuwen Zhang<sup>a§</sup>

<sup>a</sup>*Shenzhen Key Laboratory of Flexible Memory Materials and Devices, College of Physics and Optoelectronic Engineering, Shenzhen University, Shenzhen, 518060, China.*

<sup>b</sup>*Academy for Advanced Interdisciplinary Studies, Southern University of Science and Technology, Shenzhen 518055, China*

<sup>§</sup>*Current address: Renewable and Sustainable Energy Institute, University of Colorado, Boulder, Colorado 80309, USA*

**Table S1.** The lattice constants, interlayer distances and binding energies of all stacking configurations, respectively.

| Stacking configurations  | T         | V         | H         |
|--------------------------|-----------|-----------|-----------|
| Lattice constants (Å)    | a=b=12.16 | a=b=12.18 | a=b=12.18 |
| Interlayer distances (Å) | 3.26      | 3.20      | 3.18      |
| Binding energies (eV)    | -1.19     | -1.55     | -1.56     |

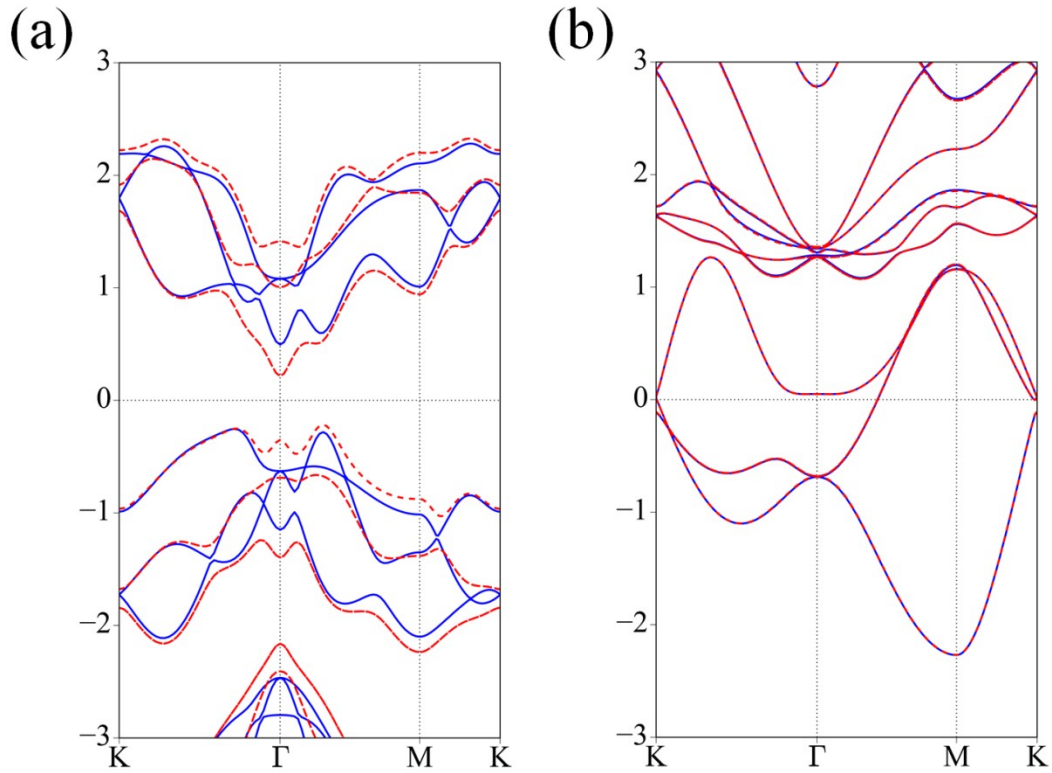

**Figure S1.** Band structures of (a)  $\alpha$ -Te and (b)  $\text{Ti}_2\text{NF}_2$  with (red, dashed line) and without (blue, solid line) inclusion of SOC.

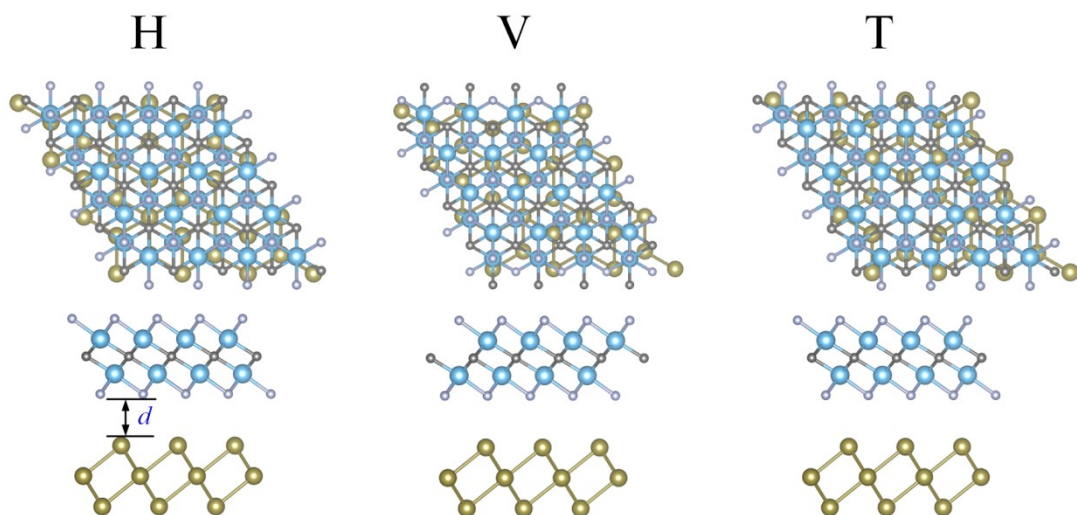

**Figure S2.** Top and side views of the optimized structures of the T, V, and H configurations for the  $\text{Ti}_2\text{NF}_2/\alpha\text{-Te}$  vdW heterostructure.

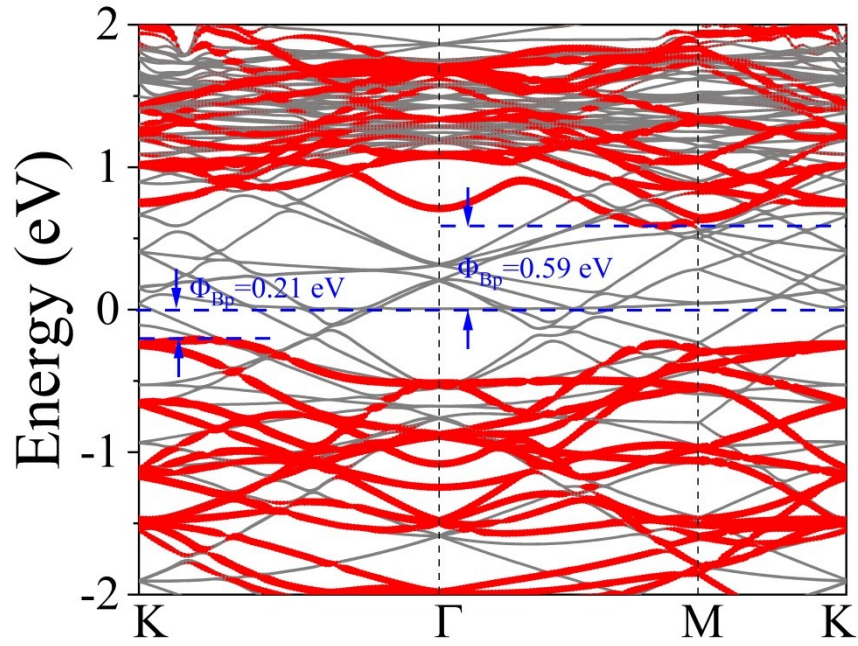

**Figure S3.** The band structure of V-type  $\text{Ti}_2\text{NF}_2/\alpha\text{-Te}$ .

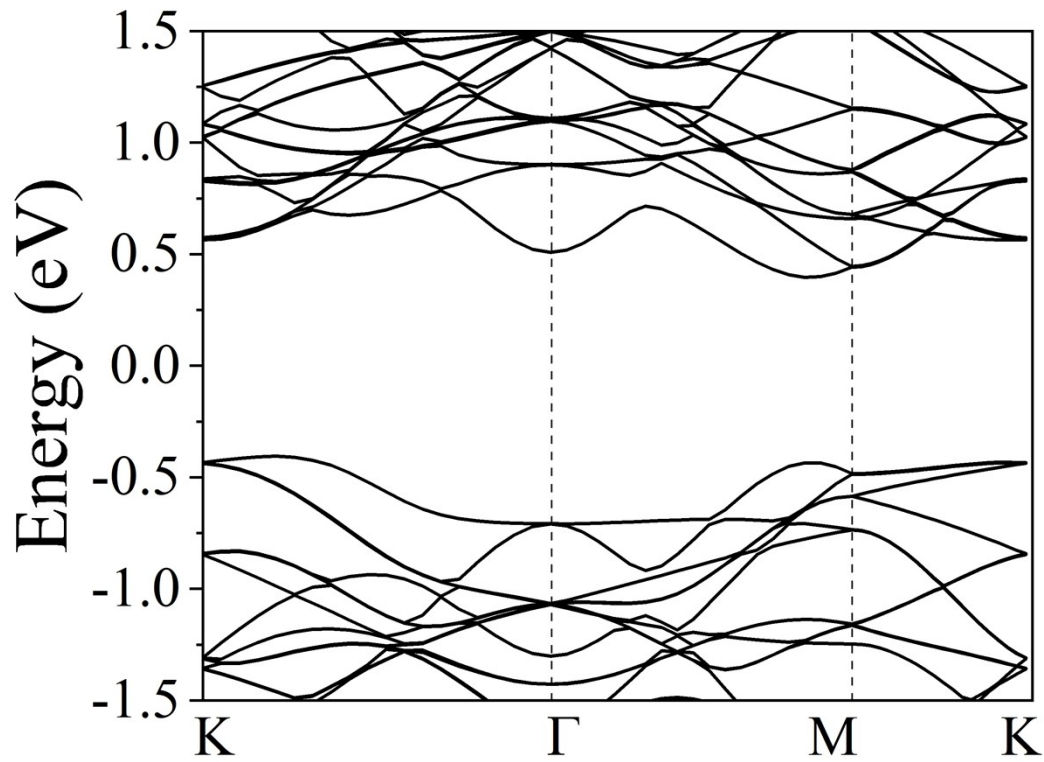

**Figure S4.** Band structure of standing alone  $\alpha\text{-Te}$  with the strained lattice constants in the heterostructure.

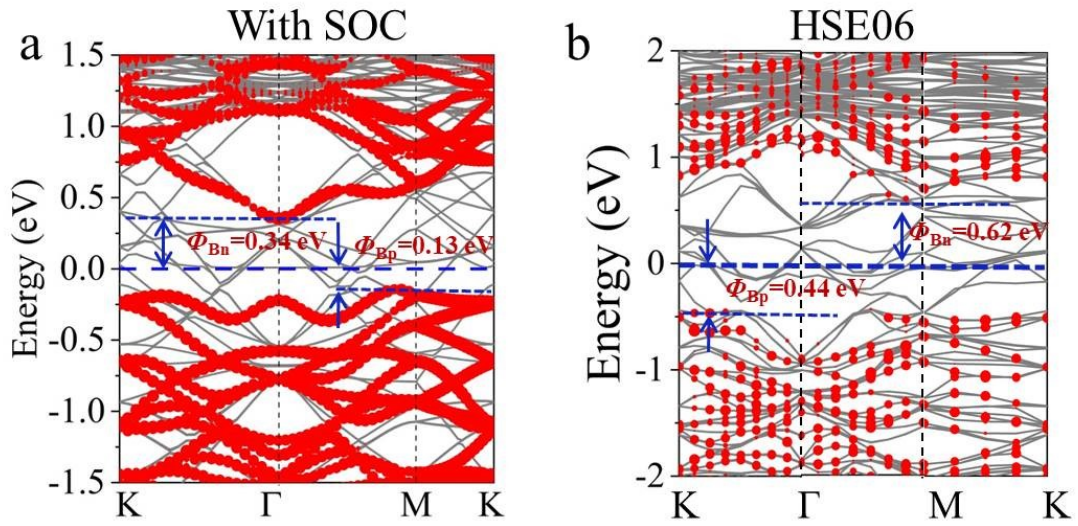

**Figure S5.** The projected band structures of  $\text{Ti}_2\text{NF}_2/\alpha\text{-Te}$  heterostructure for (a) SOC and (b) HSE06 calculations, respectively.

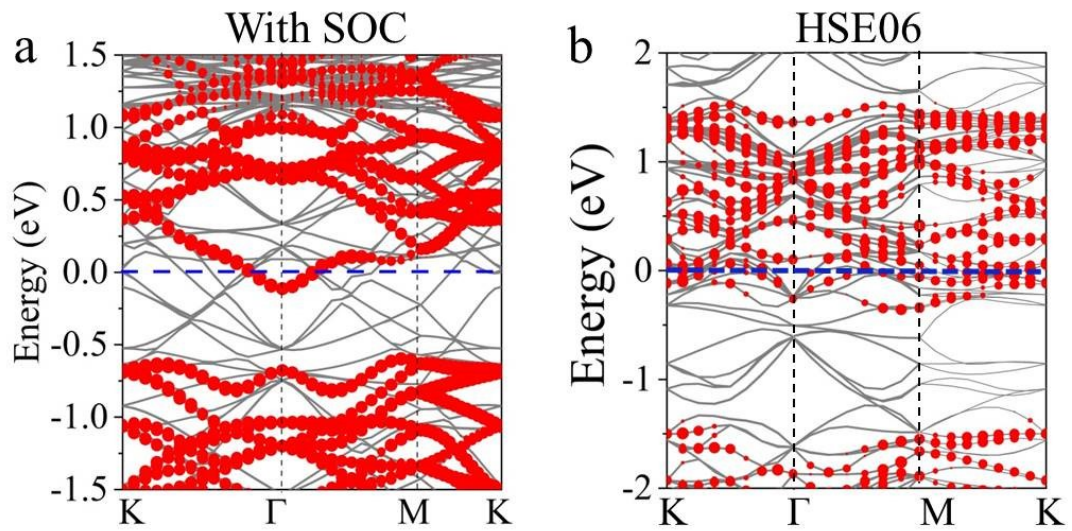

**Figure S6.** The projected band structures of  $\text{Ti}_2\text{NF}_2/\alpha\text{-Te}$  heterostructure under  $-0.6 \text{ eV/\AA}$  for (a) SOC and (b) HSE06 calculations, respectively.



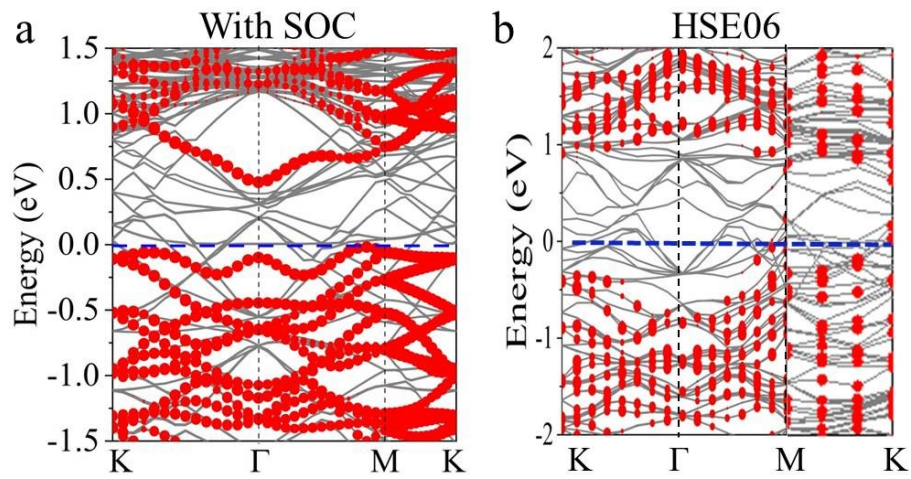

**Figure S7.** The projected band structures of  $\text{Ti}_2\text{NF}_2/\alpha\text{-Te}$  heterostructure under  $0.6 \text{ eV/\AA}$  for (a) SOC and (b) HSE06 calculations, respectively.

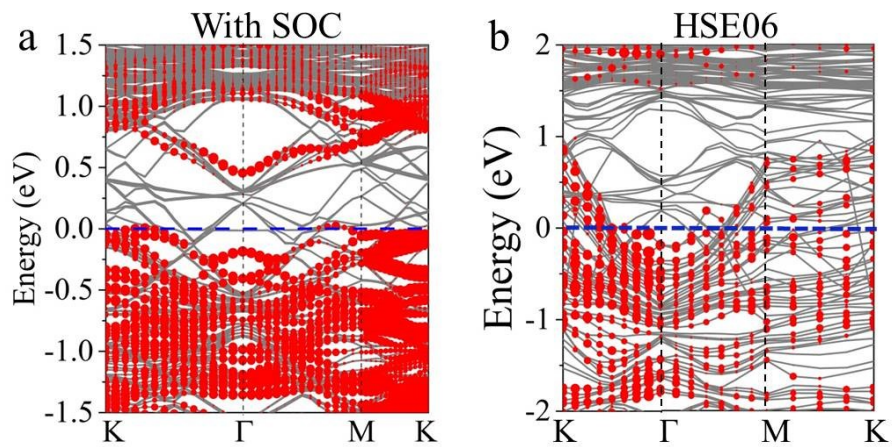

**Figure S8.** The projected band structures of  $\text{Ti}_2\text{NF}_2/\alpha\text{-Te}$  heterostructure with interlayer distance  $2.0 \text{ \AA}$  for (a) SOC and (b) HSE06 calculations, respectively.

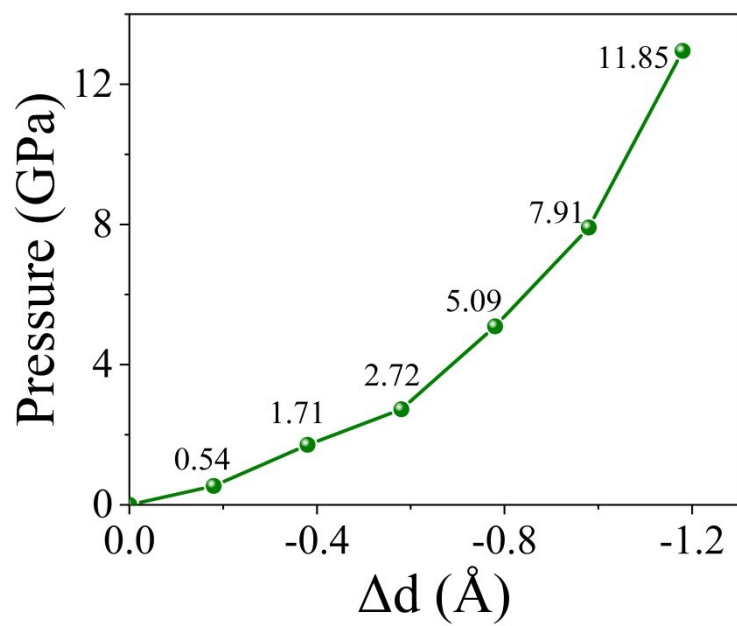

**Figure S9.** The calculated effective external vertical pressure as a function of the reduced interlayer distance  $\Delta d$ .
